# Supplementary material for: Deciphering multivalent glycocluster–lectin interactions through AFM characterization of the self-assembled nanostructures
Source: Royal Society of Chemistry journal article supplement (doi:10.1039/c9sm00371a), 2019-01-01
Supplement: c9sm00371a1.pdf [file c9sm00371a1.pdf]

## **Deciphering multivalent glycocluster-lectin interactions through AFM characterization of the self-assembled nanostructures**

Francesca Zuttion<sup>\*1</sup>, Delphine Sicard<sup>\*1†</sup>, Lucie Dupin<sup>1</sup>, Gérard Vergoten<sup>2</sup>, Camille Girard-Bock<sup>1††</sup>, Mimouna Madaoui<sup>3</sup>, Yann Chevotot<sup>1</sup>, François Morvan<sup>3</sup>, Sébastien Vidal<sup>4</sup>, Jean-Jacques Vasseur<sup>3</sup>, Eliane Souteyrand<sup>1</sup> and Magali Phaner-Goutorbe<sup>1</sup>

\* These authors contributed equally to this work

<sup>1</sup> Université de Lyon, Ecole Centrale de Lyon, Institut des Nanotechnologies de Lyon, INL UMR-5720 CNRS, 36 avenue Guy de Collongue, 69134 Ecully, France

<sup>2</sup> Université de Lille 1, Unité de Glycobiologie Structurale et Fonctionnelle, UGSF UMR-8576 CNRS, Villeneuve d'Ascq, France

<sup>3</sup> Institut des Biomolécules Max Mousseron, IBMM, Université de Montpellier, CNRS, ENSCM, Montpellier, France

<sup>4</sup> Université de Lyon, Université Claude Bernard Lyon 1, Laboratoire de Chimie Organique 2-Glycochimie, ICBMS UMR-5246 CNRS, F-69622 Villeurbanne cedex, France

† Present address: Mayo Clinic, Department of Physiology & Biomedical Engineering, 200 1st St SW, Rochester MN 55905, USA

†† Present address: CHU Sainte-Justine Research Centre, University of Montréal, Montréal, Canada

To whom correspondence should be addressed: [magali.phaner@ec-lyon.fr](mailto:magali.phaner@ec-lyon.fr)

|           | Structure, $K_d$ and $n$                                                                                         |  |
|-----------|------------------------------------------------------------------------------------------------------------------|--|
| <b>C1</b> | <p>Calix[4]arene(OMTzEG<sub>3</sub>-Gal)<sub>4</sub><br/><math>K_d = 170</math> nM<br/><math>n = 0.24</math></p> |  |
| <b>P1</b> | <p>Porphyrin(OMTzEG<sub>3</sub>-Gal)<sub>4</sub><br/><math>K_d = 330</math> nM<br/><math>n = 0.46</math></p>     |  |
| <b>M1</b> | <p>Man(POProTzEG<sub>3</sub>-Gal)<sub>4</sub><br/><math>K_d = 11000</math> nM<br/><math>n = 0.28</math></p>      |  |

|                  |                                                                                                                            |                                                                                                                                                                                                                                                                                                                                                                                                                                |
|------------------|----------------------------------------------------------------------------------------------------------------------------|--------------------------------------------------------------------------------------------------------------------------------------------------------------------------------------------------------------------------------------------------------------------------------------------------------------------------------------------------------------------------------------------------------------------------------|
| <p><b>M2</b></p> | <p>Man(POProTzAcNPh-Gal)<sub>4</sub><br/> <math>K_d = 194 \text{ nM}</math><br/> <math>n = 0.46</math></p>                 | 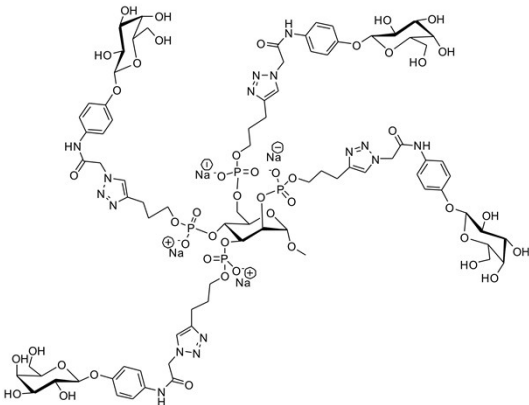 <p>The structure shows a central mannose core with four phosphate groups. Each phosphate is linked via a propyl chain to a 1,2,4-triazole ring. The triazole rings are further substituted with an acetamido group and a phenyl ring. The phenyl rings are connected to galactose units, which are shown in their cyclic pyranose form.</p> |
| <p><b>M3</b></p> | <p>Man(POEG<sub>2</sub>MTzAcNPh-Gal)<sub>4</sub><br/> <math>K_d = 157 \text{ nM}</math><br/> <math>n = 0.52</math></p>     |  <p>The structure is similar to M2, but the propyl chains are replaced by poly(ethylene glycol) (PEG) chains of length 2. The rest of the molecule, including the mannose core, phosphates, triazoles, acetamido groups, and phenyl-galactose linkages, remains the same.</p>                                                               |
| <p><b>M4</b></p> | <p>Man(POEG<sub>2</sub>MTzAcNPh-Glc)<sub>4</sub><br/> <math>K_d = \text{n.a.}</math><br/> <math>n = \text{n.a.}</math></p> |  <p>The structure is similar to M3, but the galactose units are replaced by glucose units. The rest of the molecule, including the mannose core, phosphates, triazoles, acetamido groups, and phenyl-glucose linkages, remains the same.</p>                                                                                               |

Table S1: Structure of the glycoclusters under study.
